# Supplementary material
Source: PubMed Central journal article supplement (PMC6166839)
Supplement: pnas.1720930115.sapp.pdf [file pnas.1720930115.sapp.pdf]

## Interferon Stimulation Creates Chromatin Marks And Establishes Transcriptional Memory

Rui Kamada<sup>1,2\*</sup>, Wenjing Yang<sup>3\*</sup>, Yubo Zhang<sup>3\*</sup>, Mira C. Patel<sup>1</sup>, Yanqin Yang<sup>3</sup>, Ryota Ouda<sup>1</sup>, Anup Dey<sup>1</sup>, Yoshiyuki Wakabayashi<sup>3</sup>, Kazuyasu Sakaguchi<sup>2</sup>, Takashi Fujita<sup>4</sup>, Tomohiko Tamura<sup>5</sup>, Jun Zhu<sup>3,6</sup> and Keiko Ozato<sup>1,6</sup>

1. Division of Developmental Biology, National Institute of Child Health and Human Development, National Institutes of Health, Bethesda MD 20892, USA
2. Laboratory of Biological Chemistry, Department of Chemistry, Faculty of Science, Hokkaido University, Sapporo 060-0810, Japan
3. DNA Sequencing and Genomics Core, National Institute of Heart, Lung and Blood Institute, National Institutes of Health, Bethesda MD 20892, USA
4. Laboratory of Molecular Genetics, Institute for Virus Research, Kyoto University, Sakyo-ku Kyoto 606-8507, Japan
5. Department of Immunology, Yokohama City University Graduate School of Medicine, 3-9 Kanazawa-ku, Yokohama, 236-0004, Japan
6. Corresponding authors: Keiko Ozato: [ozatok@nih.gov](mailto:ozatok@nih.gov) Jun Zhu: [jun.zhu@nih.gov](mailto:jun.zhu@nih.gov)

\*These authors made equal contributions to this work.

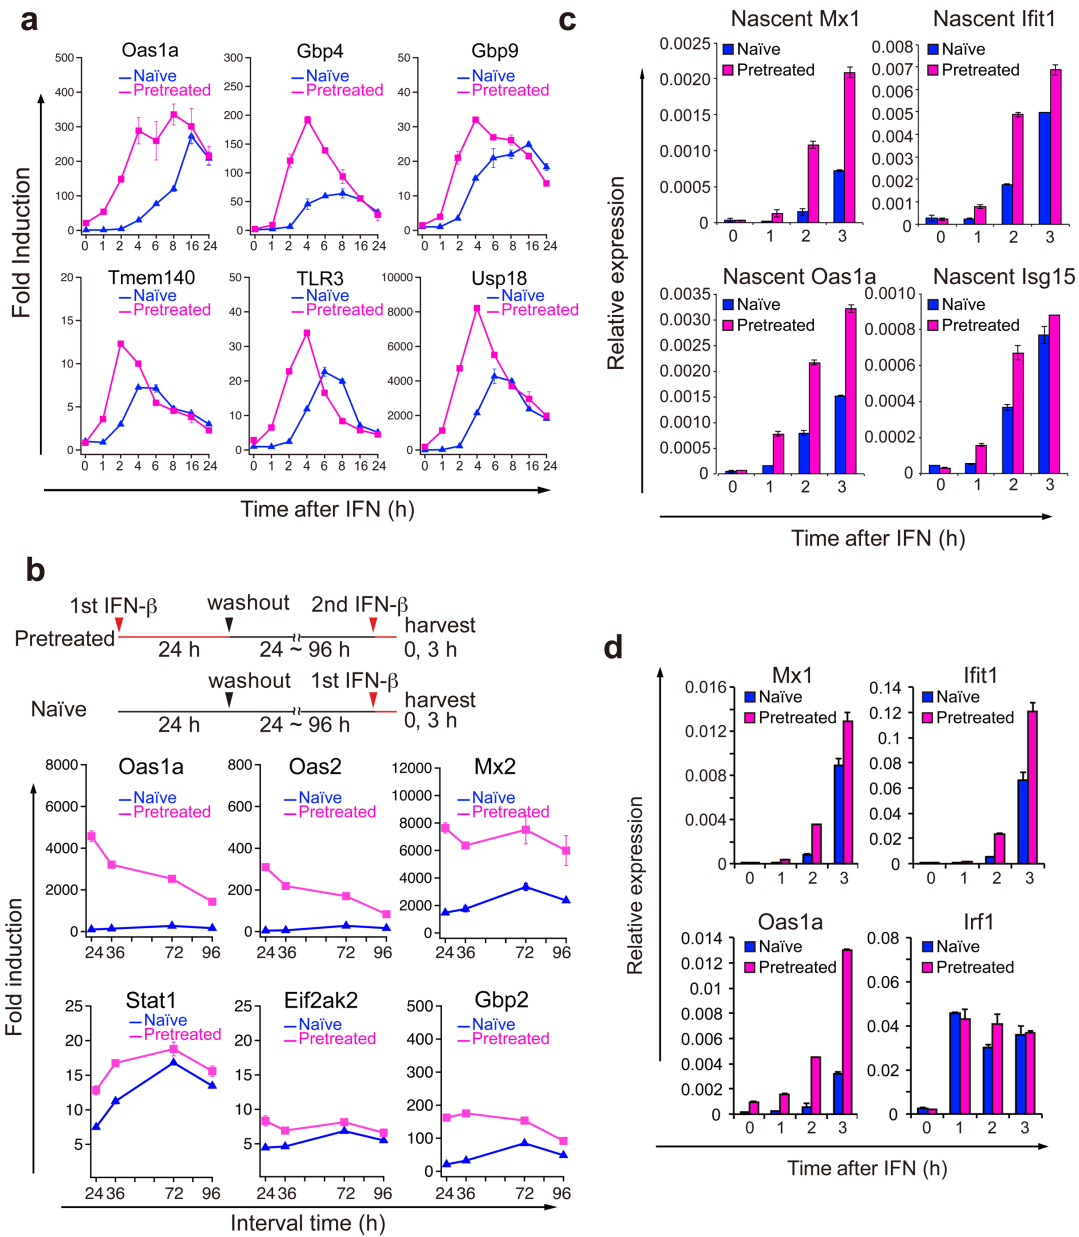

**Supplementary Fig. 1 (a-d)**

**(a)** Naïve and pretreated cells were stimulated with IFN as in Fig. 1a. mRNA expression of indicated ISGs were detected by qRT-PCR, normalized by *Gapdh*, and expressed as fold induction. Values represent the average of three experiments  $\pm$  S.D.

**(b)** Top: experimental design. Naïve and pretreated cells were left without IFN for 24 h to 96 h and stimulated with IFN for 3h. ISG mRNAs were detected as above.

**(c)** Naïve and pretreated cells were stimulated with IFN for indicated times (h) as in Fig. 1a. Nascent ISG RNAs were detected by qRT-PCR using primers covering an exon-intron boundary<sup>1</sup>.

**(d)** NIH3T3 cells were stimulated with IFN for 24 h and followed by 48 h incubation without IFN. Naïve and pretreated cells were stimulated with IFN for indicated times (h) and mRNA expression of indicated ISGs were detected by qRT-PCR, normalized by *Gapdh*. Values represent the average of three experiments  $\pm$  S.D.

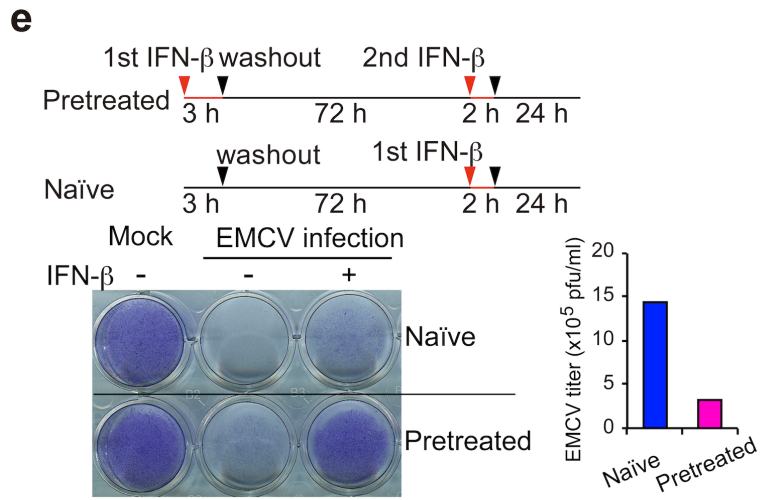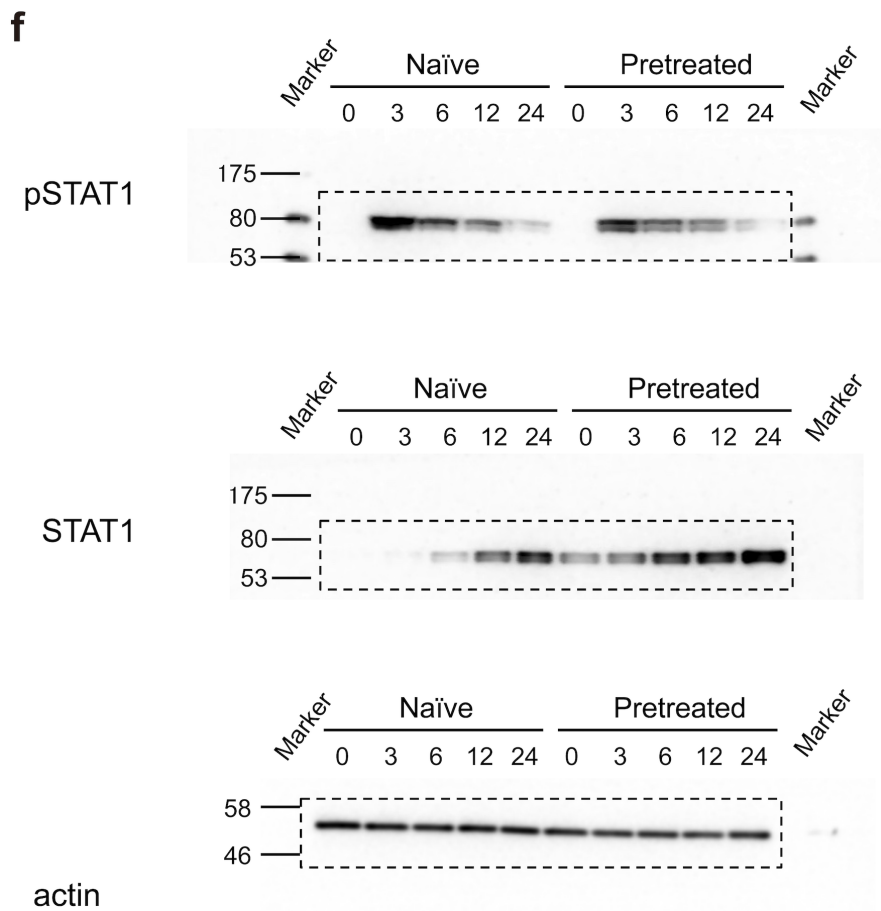

Supplementary Fig. 1 (e,f)

**(e)** Top: experimental design. Naïve and pretreated cells were treated with IFN for 2 h and then infected with EMCV (moi=10) for 24 h. Cell survival was assessed by crystal violet staining (left) and EMCV viral yields in the culture supernatants were determined by plaque assay (right).

**(f)** Uncropped images for western blots in Fig. 1g. Dotted box marks the borders of the cropped images for each protein. Marker: molecular weight marker (kDa).

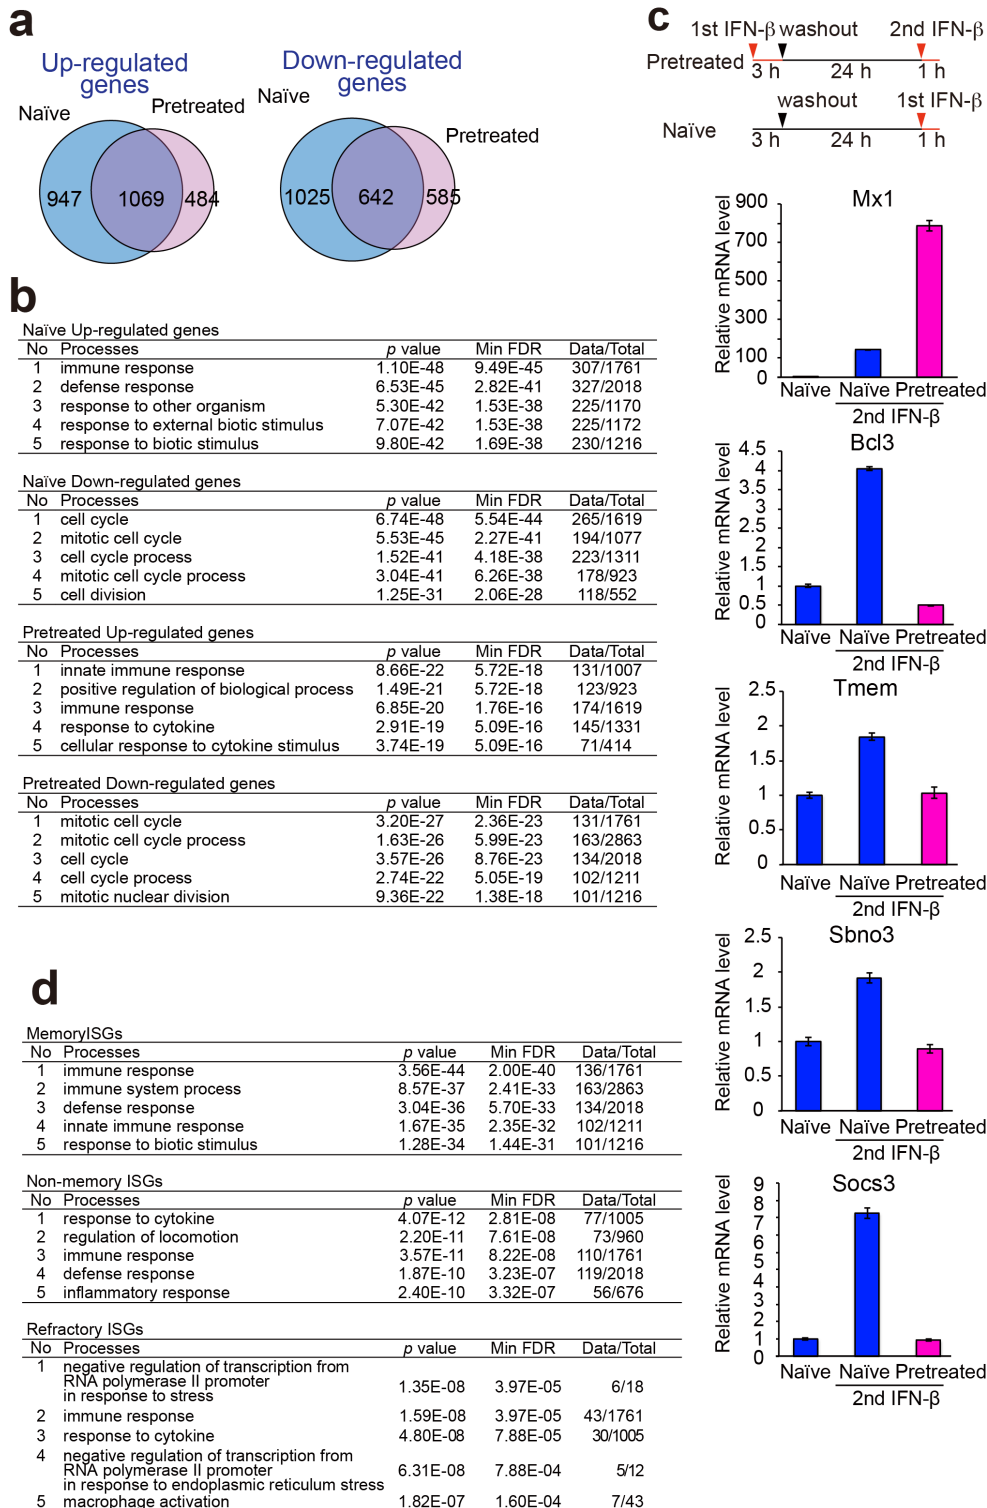

## Supplementary Fig. 2

(a) Venn diagrams depicting the number of genes upregulated (left) or downregulated by IFN $\beta$  (cut off for upregulated genes,  $> 2.0$ ,  $p < 0.05$ , downregulated genes  $< 2.0$ ,  $p < 0.05$ , at least one time point between 1, 2, 4, and 6 h over 0 h).

**(b)** GO annotation of genes upregulated or downregulated by IFN stimulation in naïve and pretreated cells. Analysis was performed with the MetaCore program at <https://portal.genego.com/>. The tables show the list of the most significant processes in upregulated or downregulated genes found in naive or pretreated cells.

**(c)** Top, left: experimental design. mRNA expression of refractory ISGs identified by RNA-seq (*Bcl3*, *Tmem*, *Sbno3*, *Socs3*) was tested by qRT-PCR for independently prepared samples. The values represent the average of three experiments  $\pm$  S.D.

**(d)** GO analysis was performed for memory, non-memory and refractory ISGs. The tables show the list of the most significant processes in the three types of ISGs.

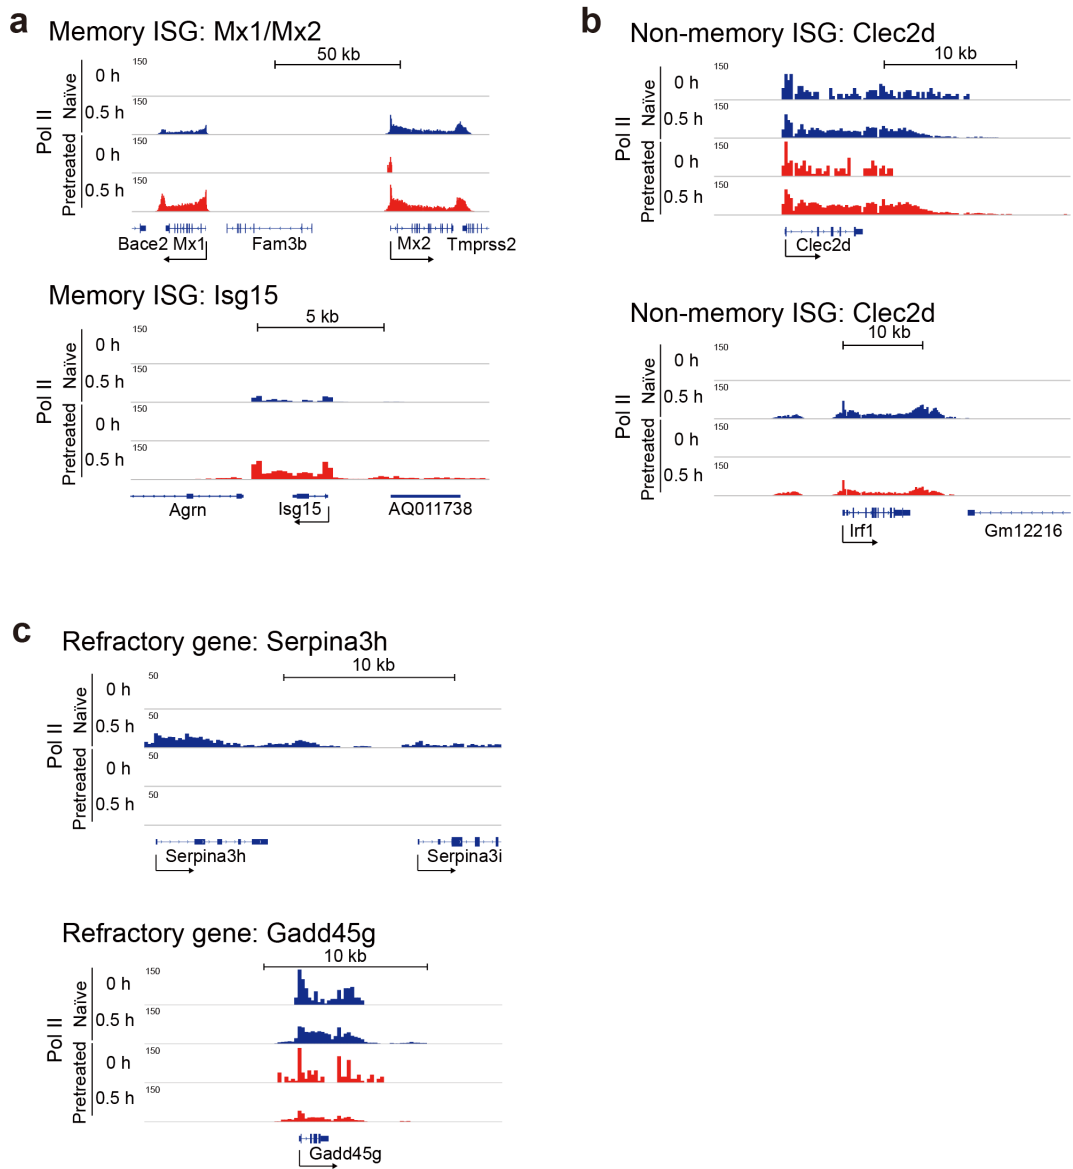

### Supplementary Fig. 3

(a) IGV depiction of distribution of Pol II over the indicated memory ISGs (*Mx1*, *Mx2*, and *Isg15*) in naïve (blue) and pretreated (red) cells.

(b) IGV data for distribution of Pol II over the non-memory ISGs (*Clec2d* and *Irf1*) in naïve (blue) and pretreated (red) cells.

(c) IGV data for Pol II over the refractory genes (*Serpina3h* and *Gadd45g*) in naïve (blue) and pretreated (red) cells.



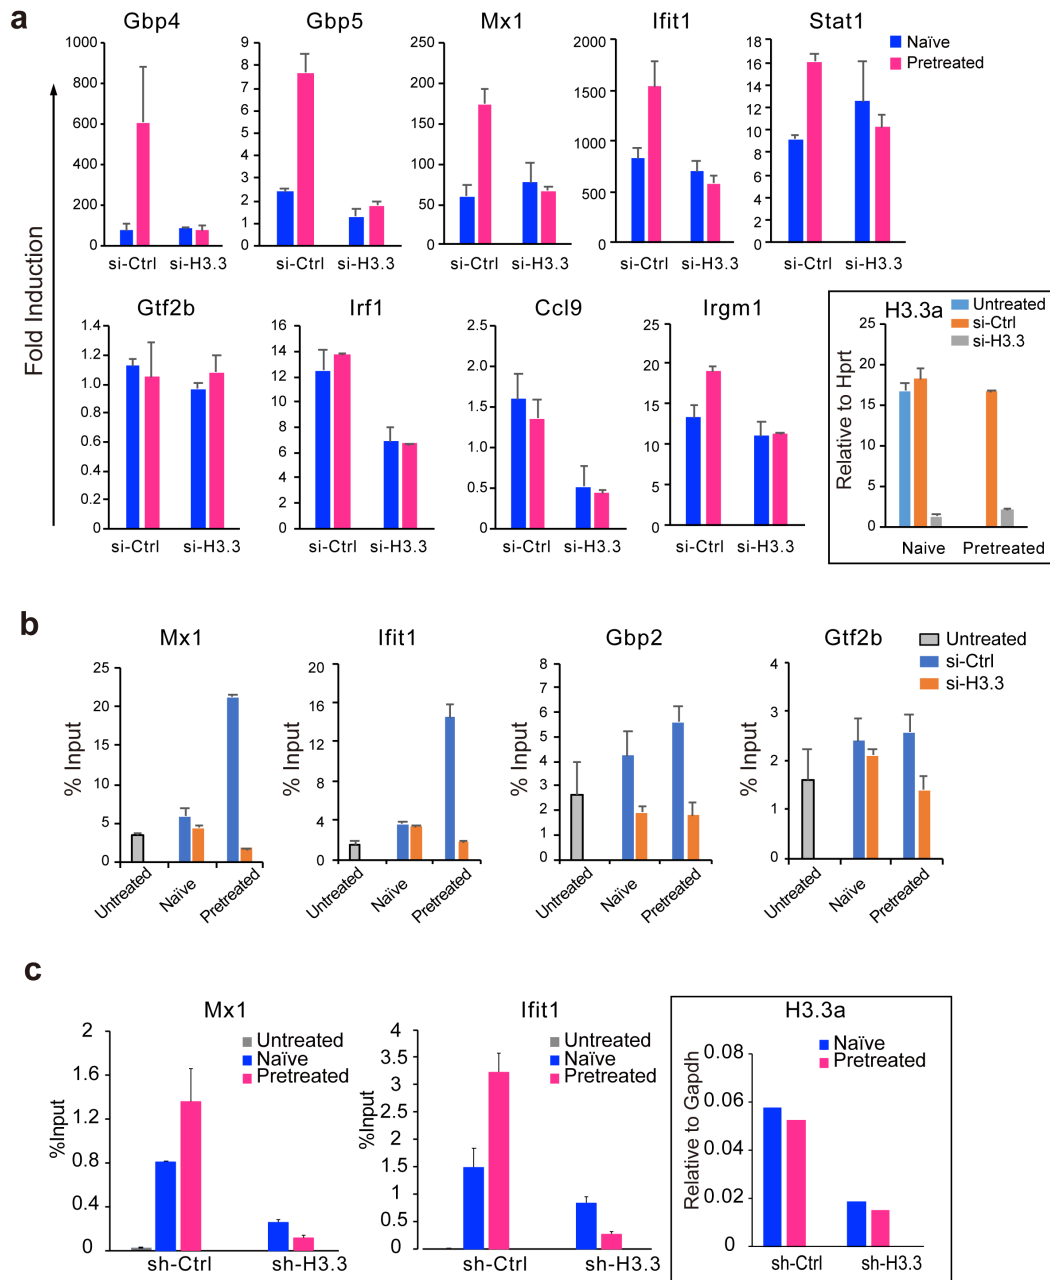

**Supplementary Fig. 4(a-c)**

**(a)** Naïve MEF cells were transfected with 50 nM of H3.3 specific, or control siRNA using Lipofectamine 2000 (Invitrogen) for 48 h prior to IFN stimulation. Pretreated MEFs (3h IFN pretreatment) were incubated with control or H3.3 specific siRNA during IFN washout as above for 48 h. siRNA treated cells were stimulated by IFN for 1h. Levels of mRNA induction were measured by qRT-PCR for indicated ISGs. Values (expressed as fold induction relative to untreated cells) represents the average of triplicate samples

from a representative experiments +/- S.D. The effect of siRNA was tested in three independently performed experiments, which gave very similar results.

**(b)** Naïve and pretreated cells were incubated with siRNA exactly as above, and chromatin was prepared 30 min after IFN stimulation. qChIP was performed for RNA Pol II binding at/near the TSS of indicated ISGs. We used the antibody as used in Figure 3 (a, d) and Figure 4 (e). Data represents the average of three independently precipitated samples +/- S.D.

**(c)** Naïve and pretreated cells (3 h pretreated and 48 h interval time) of control- or H3.3-knocked down MEFs via shRNAs, were re-stimulated with IFN for 30 min and Pol II-qChIP assays were performed to detect binding of Pol II at the TSS/promoter region of indicated memory ISGs. Data expressed as % of input. The data represent the mean  $\pm$  S.D. of triplicate samples. Representative data from one of two independent experiments are shown. Knockdown efficiency by shRNAs determined by RT-qPCR was shown in right panel.

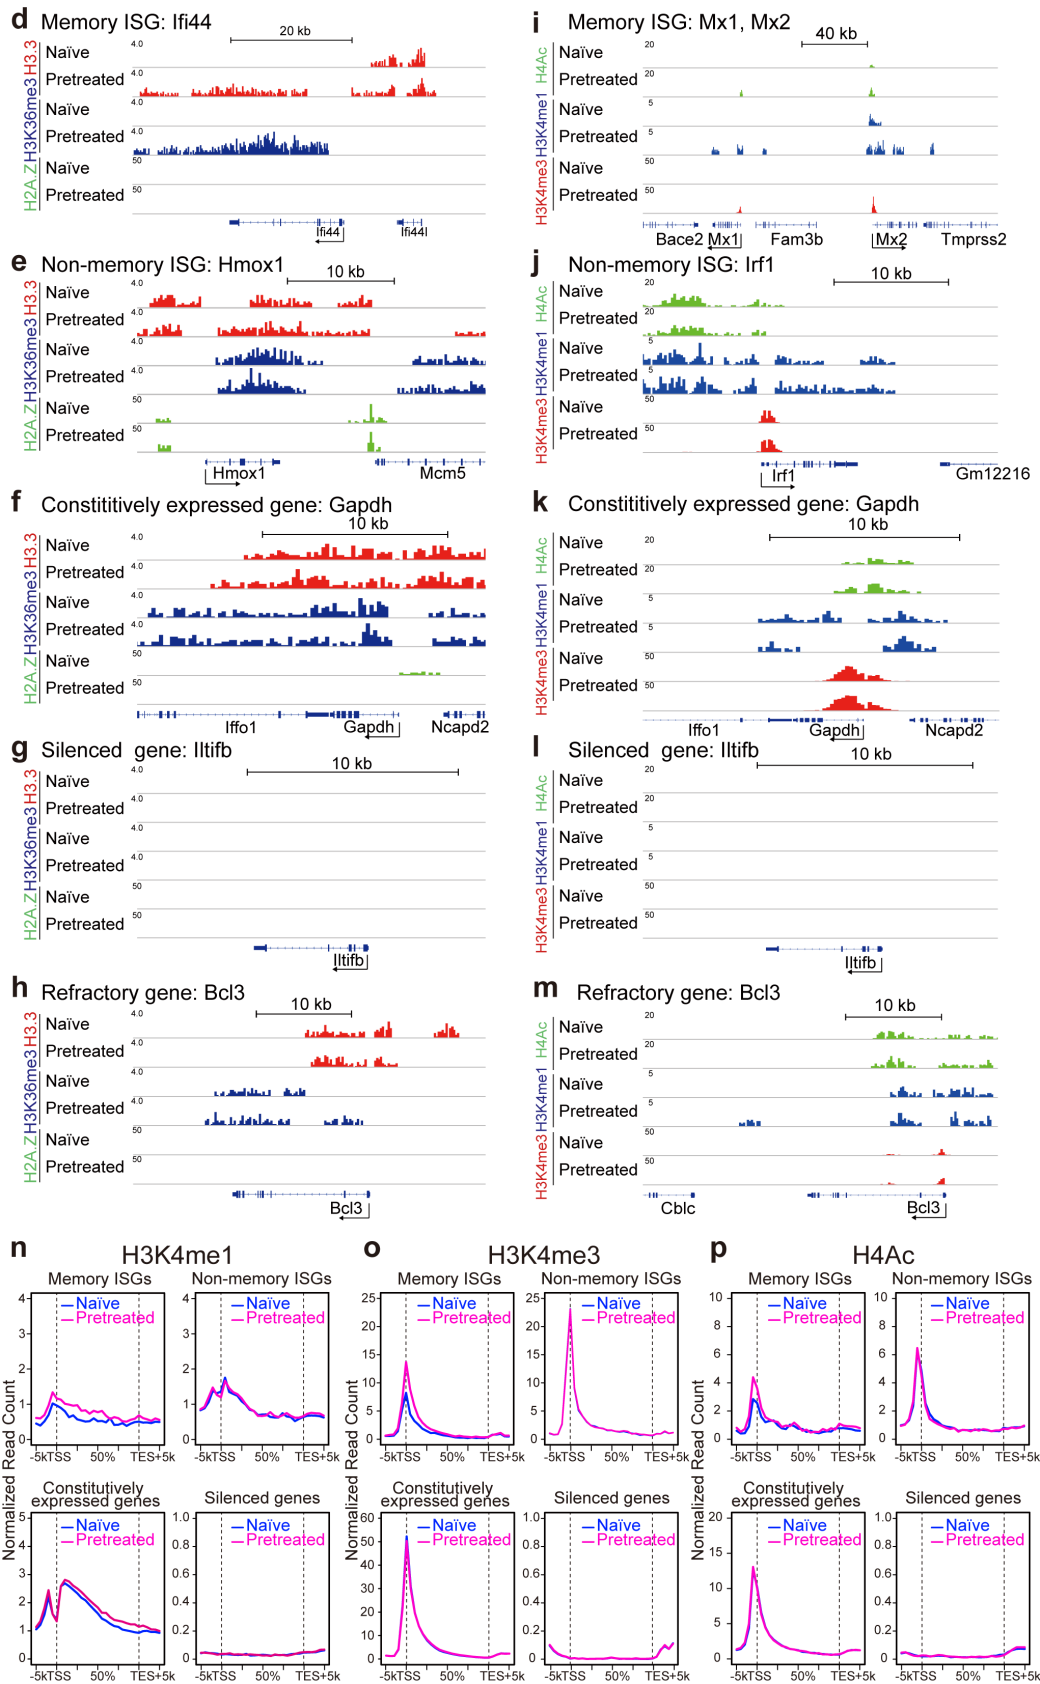

Supplementary Fig. 4(d-p)

**(d-h)** IGV images of the distribution of H3.3 (red), H3K36me3 (blue), and H2A.Z (green) over the memory ISG (*Ifi44*, d), non-memory ISG (*Hmox1*, e), constitutively expressed gene (*Gapdh*, f), silenced gene (*Itifb*, g), and refractory ISG (*Bcl3*, h).

**(i-m)** IGV images of the distribution of H4ac (red), H3K4me1 (blue), and H3K4me3 (green) over indicated memory ISGs (*Mx1* and *Mx2*, i), non-memory ISG (*Irf1*, j), constitutively expressed gene (*Gapdh*, k), silenced gene (*Itifb*, l), and refractory gene (*Bcl3*, m).

**(n-p)** Genome-wide distribution of H3K4me1 (n), H3K4me3 (o), and H4ac (p) over indicated memory ISGs, non-memory ISGs (top panels), constitutively expressed genes, or silent genes (bottom panels).

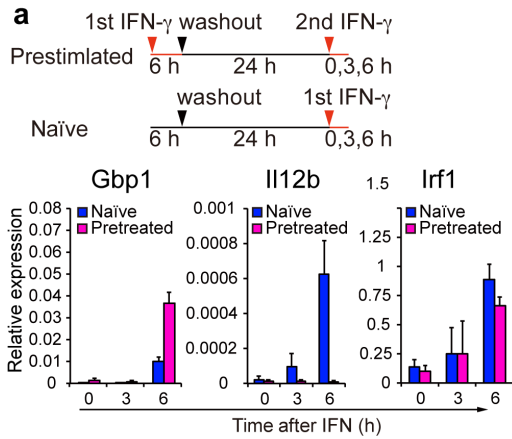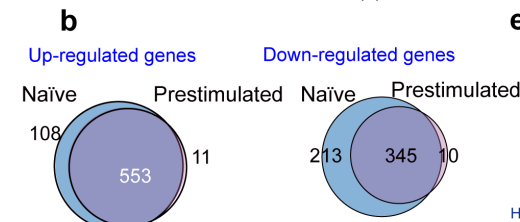

**d**

| Naive Up-regulated genes |                |          |            |  |
|--------------------------|----------------|----------|------------|--|
| No. Processes            | <i>p</i> value | Min FDR  | Data/Total |  |
| 1                        | 1.81E-48       | 7.17E-45 | 129/1170   |  |
| 2                        | 2.20E-48       | 7.17E-45 | 129/1171   |  |
| 3                        | 2.37E-47       | 5.16E-44 | 130/1216   |  |
| 4                        | 1.44E-44       | 2.35E-41 | 164/2018   |  |
| 5                        | 2.25E-44       | 2.94E-41 | 198/2863   |  |

| Naive Down-regulated genes |                |          |            |  |
|----------------------------|----------------|----------|------------|--|
| No. Processes              | <i>p</i> value | Min FDR  | Data/Total |  |
| 1                          | 2.48E-80       | 1.36E-76 | 179/1619   |  |
| 2                          | 6.28E-78       | 1.72E-74 | 162/1331   |  |
| 3                          | 6.95E-76       | 1.27E-72 | 142/1007   |  |
| 4                          | 7.29E-69       | 9.98E-66 | 130/923    |  |
| 5                          | 1.41E-60       | 1.55E-57 | 100/581    |  |

| Prestimulated Up-regulated genes |                |          |            |  |
|----------------------------------|----------------|----------|------------|--|
| No. Processes                    | <i>p</i> value | Min FDR  | Data/Total |  |
| 1                                | 3.33E-28       | 1.66E-24 | 89/2018    |  |
| 2                                | 1.26E-27       | 2.32E-24 | 67/1170    |  |
| 3                                | 1.39E-27       | 2.32E-24 | 67/1172    |  |
| 4                                | 1.88E-27       | 2.34E-24 | 68/1216    |  |
| 5                                | 6.14E-26       | 6.13E-23 | 55/816     |  |

| Prestimulated Down-regulated genes |                |          |            |  |
|------------------------------------|----------------|----------|------------|--|
| No. Processes                      | <i>p</i> value | Min FDR  | Data/Total |  |
| 1                                  | 2.15E-94       | 1.02E-90 | 159/1619   |  |
| 2                                  | 3.52E-93       | 8.35E-90 | 133/1007   |  |
| 3                                  | 5.06E-92       | 8.00E-89 | 146/1331   |  |
| 4                                  | 2.44E-83       | 2.89E-80 | 121/923    |  |
| 5                                  | 2.18E-74       | 2.07E-71 | 96/581     |  |

**c**

| Memory ISGs   |                |          |            |  |
|---------------|----------------|----------|------------|--|
| No. Processes | <i>p</i> value | Min FDR  | Data/Total |  |
| 1             | 6.76E-12       | 9.14E-09 | 20/1170    |  |
| 2             | 6.97E-12       | 9.14E-09 | 20/1172    |  |
| 3             | 1.36E-11       | 1.19E-08 | 20/1216    |  |
| 4             | 2.58E-11       | 1.69E-08 | 23/1761    |  |
| 5             | 5.28E-11       | 2.77E-08 | 10/186     |  |

| Non-memory ISGs |                |          |            |  |
|-----------------|----------------|----------|------------|--|
| No. Processes   | <i>p</i> value | Min FDR  | Data/Total |  |
| 1               | 1.36E-26       | 6.88E-23 | 89/2018    |  |
| 2               | 1.18E-23       | 2.98E-20 | 54/816     |  |
| 3               | 1.88E-22       | 3.15E-19 | 58/1005    |  |
| 4               | 2.22E-21       | 2.44E-18 | 61/1170    |  |
| 5               | 2.42E-21       | 2.44E-18 | 61/1172    |  |

| Refractory genes |                |          |            |  |
|------------------|----------------|----------|------------|--|
| No. Processes    | <i>p</i> value | Min FDR  | Data/Total |  |
| 1                | 4.88E-12       | 1.79E-08 | 37/2055    |  |
| 2                | 2.40E-11       | 3.87E-08 | 37/2169    |  |
| 3                | 3.16E-11       | 3.87E-08 | 38/2304    |  |
| 4                | 7.84E-11       | 5.83E-08 | 46/3378    |  |
| 5                | 7.94E-11       | 5.83E-08 | 37/2260    |  |

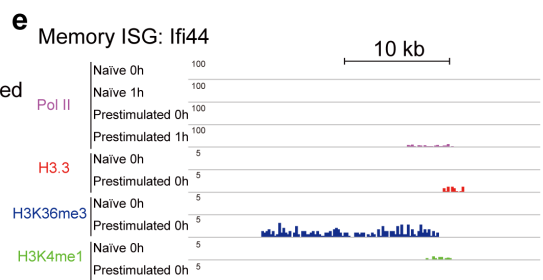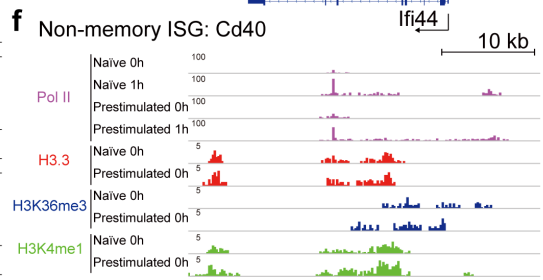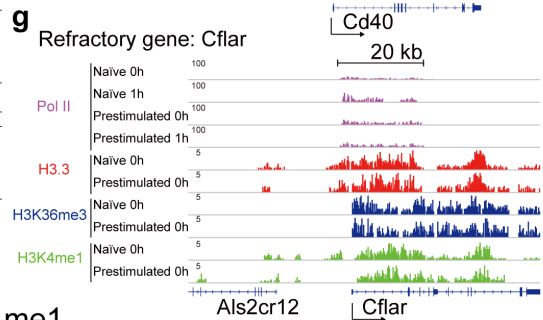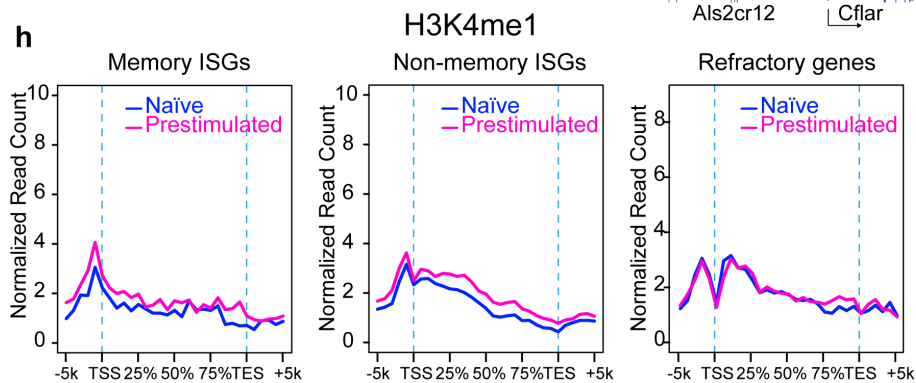

Supplementary Fig. 5

**(a)** Experimental design (top). Naïve and pretreated macrophages were stimulated with IFN $\gamma$  for 3 h and 6 h. ISG mRNA expression was detected by qRT-PCR and normalized by *Gapdh*. *Gbp1*, *Ii12b*, *Irf1* are representative of memory, refractory and non-memory ISG, respectively. The values represent the average of three assays  $\pm$  SD.

**(b)** Venn diagrams depicting the number of genes upregulated (left) or downregulated by IFN $\gamma$  (cut off for upregulated genes,  $> 2.0$ ,  $p < 0.05$ , downregulated genes  $< 2.0$ ,  $p < 0.05$ ). Some ISGs showing expression above untreated levels at time 0 in prestimulated macrophages were removed from further analysis.

**(c)** GO analysis of genes upregulated or downregulated by IFN $\gamma$  stimulation in naïve and pretreated macrophages carried out with MetaCore program. The tables represent the list of the most significant processes.

**(d)** GO analysis of memory, non-memory, and refractory ISGs identified in macrophages (Fig. 5C). The tables represent the list of the most significant processes for three types of ISGs in macrophages.

**(e-g)** IGV data for the distribution of Pol II (magenta), H3.3 (red), H3K36me3 (blue), and H3K4me1 (green) over the memory ISG (*Ifi44*, e), non-memory ISG (*Cd40*, f), refractory gene (*Cflar*, g).

**(h)** Genome-wide distribution of H3K4me1 in naïve (blue) and pretreated (magenta) macrophages over memory ISGs (left), non-memory ISGs (middle), and refractory genes (right).

## References

<sup>1</sup>Patel, M.C. *et al.* BRD4 coordinates recruitment of pause release factor P-TEFb and the pausing complex NELF/DSIF to regulate transcription elongation of interferon-stimulated genes. *Molecular and cellular biology* **33**, 2497-2507 (2013).
