# Supplementary material
Source: PubMed Central journal article supplement (PMC6166839)
Supplement: pnas.1720930115.sd03.pdf [file pnas.1720930115.sd03.pdf]

**Dataset S3**

| <b>Primer</b>   | <b>forward</b>            | <b>reverse</b>           |
|-----------------|---------------------------|--------------------------|
| <b>RT PCR</b>   |                           |                          |
| Mx1             | CCAAAAACAAGAGACCATCAACCT  | CTCAGAGCCTCTGTGGTAGCAA   |
| Ifit1           | CAGCTACCACCTTTACAGCAACC   | CCTGGTCACCATCAGCATTCT    |
| Irf1            | TGGCAGCCGACACACATC        | TGGGTCCCTGGCTCATTG       |
| Gtf2b           | TACATGGCTTCCCAGGCTTC      | CCCGATTTCTTTCTGTGTTCCG   |
| Oas1a           | AAAGCCAGGCCTGTGATCCT      | TTCCCACCGGCCACATT        |
| Gbp4            | GGAGAAGCTAACGAAGGAACAA    | TTCCACAAGGGAATCACCATTTT  |
| Gbp9            | GGTCACCGGGAATAGACTGG      | GGGCCACACTTGTTCATAGCA    |
| Tmem140         | GCCCTGTGCCTGATGTTCTAC     | GCCCATGTCCTCCTTCCAC      |
| Tlr3            | GTGAGATAACAACGTAGCTGACTG  | TCCTGCATCCAAGATAGCAAGT   |
| Usp18           | TTGGGCTCCTGAGGAAACC       | CGATGTTGTGTAACCAACCAGA   |
| Nas-Mx1         | TTGCTTTCCCTCATCTAGGATT    | GCCGCACCTTCTCCTCATAG     |
| Nas-Ifit1       | GCAGAGAGTCAAGGCAGGTTTC    | CCTTACCCCATGGTTGCTGTA    |
| Nas-Oas1a       | GCTGTTCCACTGAATGAAATCTTG  | TTGGCGTAGAATTGTTGGTTAGG  |
| Nas-Isg15       | AGTCATAGCATTAGGAGGGTTGAGA | CCCAGGCCTGCAAGCAT        |
| Oas2            | GTGGCTAAGGGTGGCTCCTAT     | ACCATCGGAGCAGCCTCTT      |
| Mx2             | CCCAGAGGCAGTGGTATTGTC     | TCCCTCATTAGCTTCCCTCAA    |
| Stat1           | GACCACGCCTTTGGGAAGTA      | TCGCTTAGGGTCGTCAAGCT     |
| Eif2ak2         | TTGGGAGGGAGTTGACTATGATC   | CCGGGTTTTGTATCGACTTGTAT  |
| Gbp2            | AACCCTGGTTCTGCTTGACACT    | AACCCTGGTTCTGCTTGACACT   |
| Bcl3            | CCGGAGGCCCTTTACTACCA      | GGAGTAGGGGTGAGTAGGCAG    |
| Sbno2           | CATCCAGCTACAGAACCGACT     | GAACCCACGAACTGTTGGTTT    |
| Socs3           | ATGGTCACCCACAGCAAGTTT     | TCCAGTAGAATCCGCTCTCCT    |
| H2-K1           | ACCAGCAGTACGCCTACGA       | AACCAGAACAGCAACGGTCCG    |
| Gbp1            | AACTGAGGGCCTGAAAGACA      | CAAAGCAAAGATCCAACAGTCATT |
| Ii12b           | AGGTCACACTGGACCAAAGG      | TGGTTTGATGATGTCCCTGA     |
| Gapdh           | GTGTTCTACCCCAATGT         | TGTCATCATACTTGGCAGGTTTC  |
| H3f3a           | TCCATGCCAAACGTGTAACAA     | GCGTATGCGGCGTGCTA        |
| <b>ChIP PCR</b> |                           |                          |
| Mx1             | CCTGGCAGCTGCACACTCT       | CCTCTATCCCTGCACAGAATCC   |

|       |                      |                         |
|-------|----------------------|-------------------------|
| lfit1 | CCTAGCTCACCCAGCCCTTT | TCTCTTGCAGACTGTCACACCAA |
| lrf1  | TGGCAGCCGACACACATC   | TGGGTCCCTGGCTCATTG      |
| Gtf2b | AGGAAGTACACAGCCCGCG  | AGGAGGGCTAAAAAGCGCTC    |
